# Supplementary material
Source: publisher figshare collection journal article supplement (https://gsajournals.figshare.com/ndownloader/files/24504380)
Supplement: Supplementary file 1 [file 24504380]

## Sheet: Dataset S2
Table S1. Polycomb domain coordinates and end types.						domain	domain
Chrom	Start	End	LE Type	RE Type	Ends	length	separation
chr2L	0	12999	CE	1	CE, 1	12999
chr2L	358000	401999	3	3	3, 3	43999	345001
chr2L	490500	539999	5	2	5, 2	49499	88501
chr2L	544500	558999	3	4	3, 4	14499	4501
chr2L	576500	602400	3	3	3, 3	25900	17501
chr2L	603800	633499	1	6	1, 6	29699	1400
chr2L	1625500	1679999	3	6	5, 6	54499	992001
chr2L	1938500	1974499	1	3	1, 3	35999	258501
chr2L	2424000	2491999	1	1	1, 1	67999	449501
chr2L	3251500	3258999	6	6	6, 6	7499	759501
chr2L	3530000	3618999	3	3	3, 3	88999	271001
chr2L	3657500	3698999	5	6	5, 6	41499	38501
chr2L	3813500	3862499	3	3	3, 3	48999	114501
chr2L	5346000	5518499	5	4	5, 4	172499	1483501
chr2L	6007500	6025499	4	1	4, 1	17999	489001
chr2L	6527000	6557499	2	3	2, 3	30499	501501
chr2L	6796000	6851499	5	3	5, 3	55499	238501
chr2L	7259000	7344499	5	6	5, 6	85499	407501
chr2L	7348500	7383999	6	1	6, 3	35499	4001
chr2L	8741500	8889499	5	5	5, 5	147999	1357501
chr2L	9070000	9085499	NR	NR	NR
chr2L	9577000	9612999	3	5	3, 5	35999	687501
chr2L	10025500	10033499	NR	NR	NR
chr2L	10292500	10297999	6	1	6, 1	5499	679501
chr2L	10347000	10356499	1	4	1, 4	9499	49001
chr2L	11285000	11495499	1	1	4, 1	210499	928501
chr2L	12075000	12093499	5	3	5, 3	18499	579501
chr2L	12547500	12690999	5	1	5, 1	143499	454001
chr2L	15084000	15113999	3	3	3, 3	29999	2393001
chr2L	15273000	15384999	3	M	M		159001
chr2L	15389500	15448999	M	5	3, 5	175999
chr2L	16357500	16489999	3	5	3, 5	132499	908501
chr2L	18713500	18830499	1	1	1, 1	116999	2223501
chr2L	18859500	18938999	3	1	3, 1	79499	29001
chr2L	19066500	19113999	4	3	4, 3	47499	127501
chr2L	19761500	19774999	1	1	1, 1	13499	647501
chr2L	20105000	20121999	5	5	5, 5	16999	330001
chr2L	20200000	20208999	NR	NR	NR
chr2L	20760500	20787999	1	3	1, 3	27499	638501
chr2L	21692000	21697499	NR	NR	NR
chr2L	21762500	21987999	1	M	M		974501
chr2L	21990500	22041499	M	6	1, 6	278999
chr2R	1594500	1640999	1	5	1, 5	46499
chr2R	3295500	3323999	3	3	3, 3	28499	1654501
chr2R	3704000	3709499	NR	NR	NR
chr2R	3879000	3952999	3 then 1*	6	1, 6	73999	555001
chr2R	4519500	4551999	3	5	3, 5	32499	566501
chr2R	4947000	4963499	5	6	5, 6	16499	395001
chr2R	5039500	5044999	NR	NR	NR
chr2R	5079500	5095499	5	1	5, 1	15999	116001
chr2R	5860500	5876499	2	5	2, 5	15999	765001	eve
chr2R	7348500	7467499	1	1	1, 1	118999	1472001	en
chr2R	7584000	7712999	1	3	1, 3	128999	116501
chr2R	8769000	8803499	1	5	1, 5	34499	1056001
chr2R	8830000	8950999	4	5	4, 5	120999	26501
chr2R	10076500	10105499	ND	2	ND, 2	28999	1125501
chr2R	10322500	10354999	5	6	5, 6	32499	217001
chr2R	10362500	10367999	6	5	6, 5	5499	7501
chr2R	10660500	10733499	1	1	1, 1	72999	292501
chr2R	11213000	11226999	3	5	3, 5	13999	479501
chr2R	11709500	11735499	5	5	5, 5	25999	482501
chr2R	14420500	14440999	6	1	6, 1	20499	2685001
chr2R	15132000	15168499	5 then 1*	1	1, 1	36499	691001
chr2R	16772500	16863499	5	3	5, 3	90999	1604001
chr2R	17239000	17269999	5	2	5, 2	30999	375501
chr2R	18105000	18185499	2	1	2, 1	80499	835001
chr2R	18883000	18947499	5	4	5, 4	64499	697501
chr2R	18978000	18984499	NR	NR	NR
chr2R	19490500	19556999	5	5	5, 5	66499	543001
chr2R	20225000	20240999	5	M	M		668001
chr2R	20246500	20278499	M	1	5, 1	53499
chr2R	20685000	20757499	3	3	3, 3	72499	406501
chr2R	20919500	20970999	5	5	5, 5	51499	162001
chr2R	20974000	21029499	5	6	5, 6	55499	3001
chr2R	21045500	21146499	5	CE	5, CE	100999	16001
chr2RHet	31500	36999	NR	NR	NR
chr3L	0	19499	NR	NR	NR
chr3L	366000	440999	1	1	1, 1	74999	329001
chr3L	1093000	1153999	6	M	M		652001
chr3L	1161500	1198499	M	6	6, 5	105499
chr3L	1352500	1490999	2	1	3, 1	138499	154001
chr3L	1892500	1940499	2	3	2, 3	47999	401501
chr3L	3616000	3712999	2	5	2, 2	96999	1675501
chr3L	3839000	3896999	1	3	1, 3	57999	126001
chr3L	5806500	5889499	3	1	3, 1	82999	1909501
chr3L	6090000	6117499	1	5	1, 5	27499	200501
chr3L	6757500	6849999	6	M	M		640001
chr3L	6853500	6881999	M	M	M
chr3L	6888000	6935499	M	5	6, 5	177999
chr3L	6973000	6987499	5	5	5, 5	14499	37501
chr3L	7930500	7963499	1	4	1, 4	32999	943001
chr3L	8994000	9047499	1	5	1, 5	53499	1030501
chr3L	10892500	11033999	5	5	5, 5	141499	1845001
chr3L	11908000	11956999	5	1	5, 1	48999	874001
chr3L	12278000	12328499	1	3	1, 3	50499	321001
chr3L	12411000	12464499	3	3	3, 3	53499	82501
chr3L	12532500	12725999	5 then 4*	2	4, 2	193499	68001
chr3L	13383500	13403999	3	2	3, 2	20499	657501
chr3L	14079500	14182999	5 then 1*	5	1, 5	103499	675501
chr3L	14556000	14614499	2	5	2, 5	58499	373001
chr3L	16005500	16030499	3	5	3, 5	24999	1391001
chr3L	19635500	19680499	3	1	3, 1	44999	3605001
chr3L	20470000	20477499	1	1	1, 1	7499	789501
chr3L	20535000	20704499	5	5	5, 5	169499	57501
chr3L	20782000	20791499	3	3	3, 3	9499	77501
chr3L	21441000	21479499	1	5	1, 5	38499	649501
chr3L	21568000	21606999	1	5 then 1*	1, 1	38999	88501
chr3L	21766500	21814499	5	4	5, 4	47999	159501
chr3L	22713000	22723999	1	1	1, 1	10999	898501
chr3LHet	199500	224499	6	6	6, 6	24999
chr3R	164500	191499	1	6	1, 6	26999
chr3R	647000	731999	3	3	3, 3	84999	455501
chr3R	1272500	1277999	NR	NR	NR
chr3R	2485500	2644999	3	M	M		1753501
chr3R	2648500	2889999	M	1	3, 1	404499
chr3R	2957000	2969999	6	3	6, 3	12999	67001
chr3R	3110500	3171999	6	5	6, 5	61499	140501
chr3R	3521000	3528999	NR	NR	NR
chr3R	3751000	3798999	1	1	1, 2	47999	579001
chr3R	3954500	4058999	1	3	1, 3	104499	155501
chr3R	4095500	4126999	3	3	3, 2	31499	36501
chr3R	4142500	4166499	3	1	3, 1	23999	15501
chr3R	4505000	4539499	1	4	1, 4	34499	338501
chr3R	6188000	6201999	1	6	1, 6	13999	1648501
chr3R	6252500	6500999	3	5	3, 5	248499	50501
chr3R	7079000	7146499	6	5	6, 5	67499	578001
chr3R	7177500	7206499	6	6	6, 6	28999	31001
chr3R	8048500	8174999	5	1	5, 1	126499	842001
chr3R	8882000	8904999	1	5	1, 5	22999	707001
chr3R	9666000	9789999	4	3	4, 3	123999	761001
chr3R	11381000	11426999	4	M	M		1591001
chr3R	11434500	11445499	M	M	M
chr3R	11451500	11513999	M	6	2, 6	132999
chr3R	11809500	11869499	1	5	1, 5	59999	295501
chr3R	11974000	11988499	1	6	1, 6	14499	104501
chr3R	12185500	12257999	3	5	3, 5	72499	197001
chr3R	12482000	12815499	3	4	3, 4	333499	224001	BX-C
chr3R	13372500	13400999	3	M	M		557001
chr3R	13408500	13429499	M	5	3, 5	56999
chr3R	13475000	13495499	6	1	6, 1	20499	45501
chr3R	13849500	13986999	1	1	1, 1	137499	354001
chr3R	14054500	14064999	1	1	1, 1	10499	67501
chr3R	14084000	14096499	1	1	1, 1	12499	19001
chr3R	14194000	14214999	1	1	1, 1	20999	97501
chr3R	16093000	16098499	NR	NR	NR
chr3R	17203000	17307999	4	3	4, 3	104999	2988001
chr3R	17314000	17345999	2	5	2, 5	31999	6001
chr3R	17352000	17396499	1	1	1, 1	44499	6001
chr3R	18954000	18978999	3	1	3, 1	24999	1557501
chr3R	19016000	19040999	5	5	5, 5	24999	37001
chr3R	19109500	19158499	1	5	1, 5	48999	68501
chr3R	20613500	20622999	NR	NR	NR
chr3R	20901000	20923999	1	3	1, 3	22999	1742501
chr3R	20962500	21019499	6	5	6, 5	56999	38501
chr3R	21887500	21930999	1	5	1, 5	43499	868001
chr3R	22993000	23053999	1	1	1, 1	60999	1062001
chr3R	24371000	24426499	3	1	3, 1	55499	1317001
chr3R	25329500	25417499	3	3	3, 3	87999	903001
chr3R	25506500	25548499	5	3	5, 3	41999	89001
chr3R	25851500	25858499	NR	NR	NR
chr3R	26513000	26614999	5	2	5, 2	101999	964501
chr3R	26715000	26771999	3	5	3, 5	56999	100001
chr3R	26887000	26914999	5	5	5, 5	27999	115001
chr3R	27894500	27904999	3	CE	3, CE	10499	979501
chr4	508000	558999	5	1	5, 1	50999
chr4	718500	752999	5	6	5, 6	34499	159501
chr4	810500	874499	6	1	6, 1	63999	57501
chr4	984500	1029499	6	6	6, 6	44999	110001
chr4	1102500	1131999	5	2	5, 2	29499	73001
chrX	465500	505999	6	1	6, 1	40499
chrX	2032000	2040999	6	4	6, 4	8999	1526001
chrX	2312000	2336999	5	1	5, 2	24999	271001
chrX	2407000	2439999	6	5	6, 5	32999	70001
chrX	2574000	2584999	6	6	6, 6	10999	134001
chrX	3964000	3987499	3	1	5, 1	23499	1379001
chrX	4265500	4426499	1	3	1, 5	160999	278001
chrX	4448500	4522999	3	1	3, 1	74499	22001
chrX	4533500	4541499	1	3	1, 3	7999	10501
chrX	4990500	4997999	NR	NR	NR
chrX	5205500	5210999	5	3	5, 3	5499	664001
chrX	5423000	5509999	5	5 then 1*	5, 5	86999	212001
chrX	5884500	5929499	5	2	5, 2	44999	374501
chrX	7025500	7164999	3	5 then 1*	3, 5	139499	1096001
chrX	7375000	7568999	6	5	6, 5	193999	210001
chrX	8337000	8354499	3	4	3, 4	17499	768001
chrX	8500500	8570999	3	3	3, 3	70499	146001
chrX	8587500	8601999	4	1	4, 1	14499	16501
chrX	8616000	8737499	2	5	2, 5	121499	14001
chrX	9177000	9211999	5	1	5, 1	34999	439501
chrX	9582000	9672999	5	3	5, 3	90999	370001
chrX	10243000	10250499	6	1	6, 1	7499	570001
chrX	11429500	11434999	NR	NR	NR
chrX	12506500	12521999	3	1	3, 1	15499	2256001
chrX	13875000	13889999	NR	NR	NR	14999	1353001
chrX	13912500	13924499	NR	NR	NR
chrX	15247000	15256499	NR	NR	NR
chrX	16000000	16116999	5	M	M		2110001
chrX	16125000	16157999	M	1	5, 1	157999
chrX	17200000	17314499	2	1	2, 1	114499	1042001
chrX	17646000	17714499	2	2	2, 2	68499	331501
chrX	18133500	18215999	5	5	5, 5	82499	419001
chrX	19425000	19454499	1	1	1, 1	29499	1209001
chrX	20504500	20526999	NR	NR	NR
chrX	20541500	20598499	NR	NR	NR
						63910	602411
					average:	size	separation
Legend. LE- Left end. RE-Right end. CE-chromosome end. NR-Not real. M-merged with next domain. ND-not determined, repetitive DNA present at the end.
	*For a few ends, the level of H3K27me3 dropped dramatically after one type of end, but continued at a significant level until another end type was reached.
	This could be due to the mixed cell population. Alternatively, the first "end" did not completely stop PRC2 from spreading H3K27me3.
			333
		# of ends that are type:		% of single-numbered types
		1 or '5 then 1*' or '3 then 1*'	100	0.294118		1	94	0.230392
		2	20	0.0588235		5 then 1*	5	0.0122549
		3	74	0.217647		3 then 1*	1	0.00245098
		4 or '5 then 4*'	18	0.0529412		4	17	0.0416667
		5	86	0.252941		5 then 4*	1	0.00245098
		6	42	0.123529
		NR	42
		M	22
		CE	3
		ND	1
		TOTAL	408
		single-numbered types TOTAL	340
